# Supplementary material
Source: PubMed Central journal article supplement (PMC3723746)
Supplement: NIHMS461850-supplement-01.pdf [file NIHMS461850-supplement-01.pdf]

Table S1. Median (IQR) eGFR by subgroup and survey period (using the subsample with available cystatin C)

| Subgroup                  | NHANES 1988-1994 |               |               | NHANES 1999-2002 |               |               |
|---------------------------|------------------|---------------|---------------|------------------|---------------|---------------|
|                           | eGFRcr           | eGFRcys       | eGFRcr-cys    | eGFRcr           | eGFRcys       | eGFRcr-cys    |
| <b>Overall</b>            | 102 (86-115)     | 109 (92-119)  | 106 (90-118)  | 94 (80-109)      | 106 (84-118)  | 100 (84-114)  |
| <b>Men</b>                | 101 (87-114)     | 110 (93-121)  | 106 (92-118)  | 94 (81-108)      | 107 (86-121)  | 101 (85-114)  |
| <b>Women</b>              | 102 (86-116)     | 107 (89-118)  | 105 (88-118)  | 95 (79-111)      | 104 (81-116)  | 99 (83-114)   |
| <b>Non-Hispanic White</b> | 100 (84-112)     | 106 (90-118)  | 103 (88-116)  | 91 (78-104)      | 103 (80-115)  | 96 (82-109)   |
| <b>Non-Hispanic Black</b> | 112 (95-127)     | 114 (100-123) | 116 (99-126)  | 106 (87-120)     | 113 (94-124)  | 111 (92-123)  |
| <b>Mexican-American</b>   | 113 (101-122)    | 117 (105-125) | 117 (105-126) | 111 (97-122)     | 120 (105-129) | 118 (102-128) |
| <b>Other</b>              | 102 (92-118)     | 113 (96-121)  | 110 (96-121)  | 103 (87-117)     | 111 (92-124)  | 109 (91-122)  |
| <b>Age &lt;65</b>         | 106 (94-117)     | 112 (100-120) | 110 (98-120)  | 99 (86-112)      | 110 (94-121)  | 105 (92-117)  |
| <b>Age ≥ 65</b>           | 73 (61- 86)      | 73 (58- 88)   | 74 (61- 86)   | 70 (56- 82)      | 68 (51- 84)   | 70 (55- 83)   |
| <b>Non-diabetic</b>       | 102 (87-115)     | 109 (92-119)  | 106 (91-118)  | 95 (81-109)      | 107 (86-119)  | 101 (86-114)  |
| <b>Diabetic</b>           | 86 (68- 98)      | 83 (64-107)   | 84 (68-105)   | 85 (67-105)      | 82 (64-111)   | 86 (64-107)   |
| <b>Non-hypertensive</b>   | 105 (91-117)     | 112 (97-120)  | 109 (95-120)  | 98 (84-111)      | 110 (92-121)  | 104 (90-116)  |
| <b>Hypertensive</b>       | 91 (74-105)      | 94 (73-110)   | 93 (75-108)   | 84 (69-100)      | 88 (66-108)   | 88 (68-104)   |
